# Supplementary material for: Genetic and Clinical Characterization of Danish Achromatopsia Patients
Source: MDPI journal article supplement (doi:10.3390/genes14030690), 2023-03-10
Supplement: s1 [file s1]

**Supplementary table S1.** Genotypes of the Danish ACHM patients, variant ACMG classification, references of previously published variants, and if the patient has been included in previously published genetic studies.

| Patient ID | Family ID | Consanguinity | Gene  | Variant   | Protein | ACMG classification                                         | gnomAD      | Reference variant | Patient previously published? |
|------------|-----------|---------------|-------|-----------|---------|-------------------------------------------------------------|-------------|-------------------|-------------------------------|
| 7*         | 219       | No            | CNGA3 | c.947G>A  | p.W316* | Pathogenic (PVS1_strong, PM3_strong, PM2_sup, PS4_sup)      | NP          | [1]               | No                            |
|            |           |               | CNGA3 | c.1495C>T | p.R499* | Pathogenic (PVS1_strong, PM3_strong, PM2_sup, PS4_moderate) | 3/282291/0  | [2]               |                               |
| 40         | 219       | No            | CNGA3 | c.947G>A  | p.W316* | Pathogenic (PVS1_strong, PM3_strong, PM2_sup, PS4_sup)      | NP          | [1]               | No                            |
|            |           |               | CNGA3 | c.1495C>T | p.R499* | Pathogenic (PVS1_strong, PM3_strong, PM2_sup, PS4_moderate) | 3/282291/0  | [2]               |                               |
| 64         | 219       | No            | CNGA3 | c.947G>A  | p.W316* | Pathogenic (PVS1_strong, PM3_strong, PM2_sup, PS4_sup)      | NP          | [1]               | No                            |
|            |           |               | CNGA3 | c.1495C>T | p.R499* | Pathogenic (PVS1_strong, PM3_strong, PM2_sup, PS4_moderate) | 3/282291/0  | [2]               |                               |
| 41         | 214       | Yes           | CNGA3 | c.847C>T  | p.R283W | Likely pathogenic (PM2_sup, PM5, PS4, PM3)                  | 25/251293/0 | [3]               | Yes [1]<br>(CHRO127)          |
|            |           |               | CNGA3 | c.847C>T  | p.R283W | Likely pathogenic (PM2_sup, PM5, PS4, PM3)                  | 25/251293/0 | [3]               |                               |
| 63*        | 214       | Yes           | CNGA3 | c.847C>T  | p.R283W | Likely pathogenic (PM2_sup, PM5, PS4, PM3)                  | 25/251293/0 | [3]               | No                            |
|            |           |               | CNGA3 | c.847C>T  | p.R283W | Likely pathogenic (PM2_sup, PM5, PS4, PM3)                  | 25/251293/0 | [3]               |                               |

|      |     |     |       |           |          |                                                                    |             |       |                     |
|------|-----|-----|-------|-----------|----------|--------------------------------------------------------------------|-------------|-------|---------------------|
| 42   | 209 | No  | CNGA3 | c.1574G>A | p.G525D  | Likely pathogenic (PP3_strong, PS3_sup, PS4_sup, PM2_sup, PM3_sup) | NP          | [1,4] | No                  |
|      |     |     | CNGA3 | c.1694C>T | p.T565M  | Likely pathogenic (PM2, PS4, PM3, PS3_MOD)                         | 47/282635/0 | [1]   |                     |
| 43   | 209 | No  | CNGA3 | c.1574G>A | p.G525D  | Likely pathogenic (PP3_strong, PS3_sup, PS4_sup, PM2_sup, PM3_sup) | NP          | [1,4] | Yes [1]<br>(CHRO79) |
|      |     |     | CNGA3 | c.1694C>T | p.T565M  | Likely pathogenic (PM2, PS4, PM3, PS3_MOD)                         | 47/282635/0 | [1]   |                     |
| 96** | 209 | No  | CNGA3 | c.1574G>A | p.G525D  | Likely pathogenic (PP3_strong, PS3_sup, PS4_sup, PM2_sup, PM3_sup) | NP          | [1,4] | No                  |
|      |     |     | CNGA3 | c.1694C>T | p.T565M  | Likely pathogenic (PM2, PS4, PM3, PS3_MOD)                         | 47/282635/0 | [1]   |                     |
| 44   |     | Yes | CNGA3 | c.387delA | p.R131fs | Pathogenic (PVS1, PM3, PM2_sup, PS4_sup)                           | NP          | [5]   | No                  |
|      |     |     | CNGA3 | c.387delA | p.R131fs | Pathogenic (PVS1, PM3, PM2_sup, PS4_sup)                           | NP          | [5]   |                     |
| 45   |     | Yes | CNGA3 | c.1641C>A | p.F547L  | Pathogenic (PS4, PM3_strong, PM2_sup, PS3_mod, PP3_moderate)       | 43/282657/1 | [1]   | No                  |
|      |     |     | CNGA3 | c.1641C>A | p.F547L  | Pathogenic (PS4, PM3_strong, PM2_sup, PS3_mod, PP3_moderate)       | 43/282657/1 | [1]   |                     |
| 46   | 203 | No  | CNGA3 | c.847C>T  | p.R283W  | Pathogenic (PS4_strong, PM3_very strong, PM2_sup, PP3_moderate)    | 25/251293/0 | [3]   | Yes [1]<br>(CHRO74) |
|      |     |     | CNGA3 | c.1688G>A | p.R563H  | Pathogenic (PS4, PM3_strong, PP3_strong, PM2_sup)                  | 20/282622/0 | [1]   |                     |
| 62*  | 203 | No  | CNGA3 | c.847C>T  | p.R283W  | Pathogenic (PS4_strong, PM3_strong, PM2_sup, PP3_moderate)         | 25/251293/0 | [1]   | No                  |
|      |     |     | CNGA3 | c.1688G>A | p.R563H  | Pathogenic (PS4, PM3_very strong, PP3_strong, PM2_sup)             | 20/282622/0 | [1]   |                     |

|    |     |         |       |              |          |                                                                           |                |     |    |
|----|-----|---------|-------|--------------|----------|---------------------------------------------------------------------------|----------------|-----|----|
| 61 |     | No      | CNGA3 | c.847C>T     | p.R283W  | Pathogenic (PS4_strong, PM3_very strong, PM2_sup, PP3_moderate)           | 25/251293/0    | [1] | No |
|    |     |         | CNGA3 | c.1574G>A    | p.G525D  | Likely pathogenic (PP3_strong, PS3_sup, PS4_sup, PM2_sup, PM3_sup)        | NP             | [1] |    |
| 76 |     | No      | CNGA3 | c.67C>T      | p.R23*   | Pathogenic (PVS1, PS4_moderate, PM2_sup)                                  | 10/282444/0    | [6] | No |
|    |     |         | CNGA3 | c.130_151dup | p.A51fs  | Pathogenic (PVS1, PM2_sup, PS4_sup, PM3_sup)                              | NP             | [7] |    |
| 77 | 555 | No      | CNGA3 | c.829C>T     | p.R277C  | Pathogenic (PS4, PM3_strong, PP3_strong, PS3_moderate, PM1, PM5, PM2_sup) | 24/251326/0    | [1] | No |
|    |     |         | CNGA3 | c.847C>T     | p.R283W  | Pathogenic (PS4_strong, PM3_very strong, PM2_sup, PP3_moderate)           | 25/251293/0    | [1] |    |
| 78 | 555 | No      | CNGA3 | c.829C>T     | p.R277C  | Pathogenic (PS4, PM3_strong, PP3_strong, PS3_moderate, PM1, PM5, PM2_sup) | 24/251326/0    | [1] | No |
|    |     |         | CNGA3 | c.847C>T     | p.R283W  | Pathogenic (PS4_strong, PM3_very strong, PM2_sup, PP3_moderate)           | 25/251293/0    | [1] |    |
| 93 |     | Unknown | CNGA3 | c.1641C>A    | p.F547L  | Pathogenic (PS4, PM3_strong, PM2_sup, PS3_mod, PP3_moderate)              | 43/282657/1    | [1] | No |
|    |     |         | CNGA3 | c.1641C>A    | p.F547L  | Pathogenic (PS4, PM3_strong, PM2_sup, PS3_mod, PP3_moderate)              | 43/282657/1    | [1] |    |
| 92 |     | No      | CNGB3 | c.1148delC   | p.T383fs | Pathogenic (PVS1, PS4, PM3_strong, PM2_sup)                               | 40/282682/0    | [8] | No |
|    |     |         | CNGB3 | c.1208G>A    | p.R403Q  | Pathogenic (PS4_strong, PM3_very strong, PS3_mod, BS)                     | 1128/281228/24 | [9] |    |
|    |     |         | CNGA3 | c.1669G>A    | p.G557R  | Pathogenic (PS4, PP3_strong, PM2_sup, PS3_sup)                            | 40/282682/0    | [3] |    |
| 1  |     | No      | CNGB3 | c.1148delC   | p.T383fs | Pathogenic (PVS1, PS4, PM3_strong, PM2_sup)                               | 489/281215/2   | [8] | No |

|     |     |     |       |            |          |                                             |              |     |    |
|-----|-----|-----|-------|------------|----------|---------------------------------------------|--------------|-----|----|
|     |     |     | CNGB3 | c.1148delC | p.T383fs | Pathogenic (PVS1, PS4, PM3_strong, PM2_sup) | 489/281215/2 | [8] |    |
| 6   |     | No  | CNGB3 | c.1148delC | p.T383fs | Pathogenic (PVS1, PS4, PM3_strong, PM2_sup) | 489/281215/2 | [8] | No |
|     |     |     | CNGB3 | c.1148delC | p.T383fs | Pathogenic (PVS1, PS4, PM3_strong, PM2_sup) | 489/281215/2 | [8] |    |
| 9   |     | No  | CNGB3 | c.1148delC | p.T383fs | Pathogenic (PVS1, PS4, PM3_strong, PM2_sup) | 489/281215/2 | [8] | No |
|     |     |     | CNGB3 | c.1148delC | p.T383fs | Pathogenic (PVS1, PS4, PM3_strong, PM2_sup) | 489/281215/2 | [8] |    |
| 11  |     | No  | CNGB3 | c.1148delC | p.T383fs | Pathogenic (PVS1, PS4, PM3_strong, PM2_sup) | 489/281215/2 | [8] | No |
|     |     |     | CNGB3 | c.1148delC | p.T383fs | Pathogenic (PVS1, PS4, PM3_strong, PM2_sup) | 489/281215/2 | [8] |    |
| 12  |     | No  | CNGB3 | c.1148delC | p.T383fs | Pathogenic (PVS1, PS4, PM3_strong, PM2_sup) | 489/281215/2 | [8] | No |
|     |     |     | CNGB3 | c.1148delC | p.T383fs | Pathogenic (PVS1, PS4, PM3_strong, PM2_sup) | 489/281215/2 | [8] |    |
| 10  | 201 | Yes | CNGB3 | c.1148delC | p.T383fs | Pathogenic (PVS1, PS4, PM3_strong, PM2_sup) | 489/281215/2 | [8] | No |
|     |     |     | CNGB3 | c.1148delC | p.T383fs | Pathogenic (PVS1, PS4, PM3_strong, PM2_sup) | 489/281215/2 | [8] |    |
| 21  | 201 | Yes | CNGB3 | c.1148delC | p.T383fs | Pathogenic (PVS1, PS4, PM3_strong, PM2_sup) | 489/281215/2 | [8] | No |
|     |     |     | CNGB3 | c.1148delC | p.T383fs | Pathogenic (PVS1, PS4, PM3_strong, PM2_sup) | 489/281215/2 | [8] |    |
| 13  | 212 | No  | CNGB3 | c.1148delC | p.T383fs | Pathogenic (PVS1, PS4, PM3_strong, PM2_sup) | 489/281215/2 | [8] | No |
|     |     |     | CNGB3 | c.1148delC | p.T383fs | Pathogenic (PVS1, PS4, PM3_strong, PM2_sup) | 489/281215/2 | [8] |    |
| 60* | 212 | No  | CNGB3 | c.1148delC | p.T383fs | Pathogenic (PVS1, PS4, PM3_strong, PM2_sup) | 489/281215/2 | [8] | No |
|     |     |     | CNGB3 | c.1148delC | p.T383fs | Pathogenic (PVS1, PS4, PM3_strong, PM2_sup) | 489/281215/2 | [8] |    |
| 14  |     | No  | CNGB3 | c.1148delC | p.T383fs | Pathogenic (PVS1, PS4, PM3_strong, PM2_sup) | 489/281215/2 | [8] | No |

|     |     |    |       |            |          |                                             |              |     |                              |
|-----|-----|----|-------|------------|----------|---------------------------------------------|--------------|-----|------------------------------|
|     |     |    | CNGB3 | c.1148delC | p.T383fs | Pathogenic (PVS1, PS4, PM3_strong, PM2_sup) | 489/281215/2 | [8] |                              |
| 19  |     | No | CNGB3 | c.1148delC | p.T383fs | Pathogenic (PVS1, PS4, PM3_strong, PM2_sup) | 489/281215/2 | [8] | No                           |
|     |     |    | CNGB3 | c.1148delC | p.T383fs | Pathogenic (PVS1, PS4, PM3_strong, PM2_sup) | 489/281215/2 | [8] |                              |
| 15* | 205 | No | CNGB3 | c.1148delC | p.T383fs | Pathogenic (PVS1, PS4, PM3_strong, PM2_sup) | 489/281215/2 | [8] | Yes [10] (clinical findings) |
|     |     |    | CNGB3 | c.1148delC | p.T383fs | Pathogenic (PVS1, PS4, PM3_strong, PM2_sup) | 489/281215/2 | [8] |                              |
| 20  | 205 | No | CNGB3 | c.1148delC | p.T383fs | Pathogenic (PVS1, PS4, PM3_strong, PM2_sup) | 489/281215/2 | [8] | Yes [10] (clinical findings) |
|     |     |    | CNGB3 | c.1148delC | p.T383fs | Pathogenic (PVS1, PS4, PM3_strong, PM2_sup) | 489/281215/2 | [8] |                              |
| 94* | 205 | No | CNGB3 | c.1148delC | p.T383fs | Pathogenic (PVS1, PS4, PM3_strong, PM2_sup) | 489/281215/2 | [8] | Yes [10] (clinical findings) |
|     |     |    | CNGB3 | c.1148delC | p.T383fs | Pathogenic (PVS1, PS4, PM3_strong, PM2_sup) | 489/281215/2 | [8] |                              |
| 27* | 205 | No | CNGB3 | c.1148delC | p.T383fs | Pathogenic (PVS1, PS4, PM3_strong, PM2_sup) | 489/281215/2 | [8] | Yes [10] (clinical findings) |
|     |     |    | CNGB3 | c.1148delC | p.T383fs | Pathogenic (PVS1, PS4, PM3_strong, PM2_sup) | 489/281215/2 | [8] |                              |
| 16  |     | No | CNGB3 | c.1148delC | p.T383fs | Pathogenic (PVS1, PS4, PM3_strong, PM2_sup) | 489/281215/2 | [8] | No                           |
|     |     |    | CNGB3 | c.1148delC | p.T383fs | Pathogenic (PVS1, PS4, PM3_strong, PM2_sup) | 489/281215/2 | [8] |                              |
| 17  |     | No | CNGB3 | c.1148delC | p.T383fs | Pathogenic (PVS1, PS4, PM3_strong, PM2_sup) | 489/281215/2 | [8] | No                           |
|     |     |    | CNGB3 | c.1148delC | p.T383fs | Pathogenic (PVS1, PS4, PM3_strong, PM2_sup) | 489/281215/2 | [8] |                              |
| 18  |     | No | CNGB3 | c.1148delC | p.T383fs | Pathogenic (PVS1, PS4, PM3_strong, PM2_sup) | 489/281215/2 | [8] | No                           |
|     |     |    | CNGB3 | c.1148delC | p.T383fs | Pathogenic (PVS1, PS4, PM3_strong, PM2_sup) | 489/281215/2 | [8] |                              |
| 22  |     | No | CNGB3 | c.1148delC | p.T383fs | Pathogenic (PVS1, PS4, PM3_strong, PM2_sup) | 489/281215/2 | [8] | No                           |

|      |     |     |       |            |          |                                             |              |     |                              |
|------|-----|-----|-------|------------|----------|---------------------------------------------|--------------|-----|------------------------------|
|      |     |     | CNGB3 | c.1148delC | p.T383fs | Pathogenic (PVS1, PS4, PM3_strong, PM2_sup) | 489/281215/2 | [8] |                              |
| 23   |     | No  | CNGB3 | c.1148delC | p.T383fs | Pathogenic (PVS1, PS4, PM3_strong, PM2_sup) | 489/281215/2 | [8] | No                           |
|      |     |     | CNGB3 | c.1148delC | p.T383fs | Pathogenic (PVS1, PS4, PM3_strong, PM2_sup) | 489/281215/2 | [8] |                              |
| 24   |     | No  | CNGB3 | c.1148delC | p.T383fs | Pathogenic (PVS1, PS4, PM3_strong, PM2_sup) | 489/281215/2 | [8] | No                           |
|      |     |     | CNGB3 | c.1148delC | p.T383fs | Pathogenic (PVS1, PS4, PM3_strong, PM2_sup) | 489/281215/2 | [8] |                              |
| 25   |     | No  | CNGB3 | c.1148delC | p.T383fs | Pathogenic (PVS1, PS4, PM3_strong, PM2_sup) | 489/281215/2 | [8] | No                           |
|      |     |     | CNGB3 | c.1148delC | p.T383fs | Pathogenic (PVS1, PS4, PM3_strong, PM2_sup) | 489/281215/2 | [8] |                              |
| 26   |     | No  | CNGB3 | c.1148delC | p.T383fs | Pathogenic (PVS1, PS4, PM3_strong, PM2_sup) | 489/281215/2 | [8] | No                           |
|      |     |     | CNGB3 | c.1148delC | p.T383fs | Pathogenic (PVS1, PS4, PM3_strong, PM2_sup) | 489/281215/2 | [8] |                              |
| 28*  | 204 | No  | CNGB3 | c.1148delC | p.T383fs | Pathogenic (PVS1, PS4, PM3_strong, PM2_sup) | 489/281215/2 | [8] | No                           |
|      |     |     | CNGB3 | c.1148delC | p.T383fs | Pathogenic (PVS1, PS4, PM3_strong, PM2_sup) | 489/281215/2 | [8] |                              |
| 29*  | 204 | No  | CNGB3 | c.1148delC | p.T383fs | Pathogenic (PVS1, PS4, PM3_strong, PM2_sup) | 489/281215/2 | [8] | No                           |
|      |     |     | CNGB3 | c.1148delC | p.T383fs | Pathogenic (PVS1, PS4, PM3_strong, PM2_sup) | 489/281215/2 | [8] |                              |
| 30   | 204 | No  | CNGB3 | c.1148delC | p.T383fs | Pathogenic (PVS1, PS4, PM3_strong, PM2_sup) | 489/281215/2 | [8] | No                           |
|      |     |     | CNGB3 | c.1148delC | p.T383fs | Pathogenic (PVS1, PS4, PM3_strong, PM2_sup) | 489/281215/2 | [8] |                              |
| 95** | 204 | No  | CNGB3 | c.1148delC | p.T383fs | Pathogenic (PVS1, PS4, PM3_strong, PM2_sup) | 489/281215/2 | [8] | No                           |
|      |     |     | CNGB3 | c.1148delC | p.T383fs | Pathogenic (PVS1, PS4, PM3_strong, PM2_sup) | 489/281215/2 | [8] |                              |
| 31   |     | Yes | CNGB3 | c.1148delC | p.T383fs | Pathogenic (PVS1, PS4, PM3_strong, PM2_sup) | 489/281215/2 | [8] | Yes [11] (clinical findings) |

|      |         |     |       |            |          |                                             |              |     |    |
|------|---------|-----|-------|------------|----------|---------------------------------------------|--------------|-----|----|
|      |         |     | CNGB3 | c.1148delC | p.T383fs | Pathogenic (PVS1, PS4, PM3_strong, PM2_sup) | 489/281215/2 | [8] |    |
| 32   | No      |     | CNGB3 | c.1148delC | p.T383fs | Pathogenic (PVS1, PS4, PM3_strong, PM2_sup) | 489/281215/2 | [8] | No |
|      |         |     | CNGB3 | c.1148delC | p.T383fs | Pathogenic (PVS1, PS4, PM3_strong, PM2_sup) | 489/281215/2 | [8] |    |
| 33   | No      |     | CNGB3 | c.1148delC | p.T383fs | Pathogenic (PVS1, PS4, PM3_strong, PM2_sup) | 489/281215/2 | [8] | No |
|      |         |     | CNGB3 | c.1148delC | p.T383fs | Pathogenic (PVS1, PS4, PM3_strong, PM2_sup) | 489/281215/2 | [8] |    |
| 34   | No      |     | CNGB3 | c.1148delC | p.T383fs | Pathogenic (PVS1, PS4, PM3_strong, PM2_sup) | 489/281215/2 | [8] | No |
|      |         |     | CNGB3 | c.1148delC | p.T383fs | Pathogenic (PVS1, PS4, PM3_strong, PM2_sup) | 489/281215/2 | [8] |    |
| 47   | No      |     | CNGB3 | c.1148delC | p.T383fs | Pathogenic (PVS1, PS4, PM3_strong, PM2_sup) | 489/281215/2 | [8] | No |
|      |         |     | CNGB3 | c.1148delC | p.T383fs | Pathogenic (PVS1, PS4, PM3_strong, PM2_sup) | 489/281215/2 | [8] |    |
| 48   | 1089    | Yes | CNGB3 | c.1148delC | p.T383fs | Pathogenic (PVS1, PS4, PM3_strong, PM2_sup) | 489/281215/2 | [8] | No |
|      |         |     | CNGB3 | c.1148delC | p.T383fs | Pathogenic (PVS1, PS4, PM3_strong, PM2_sup) | 489/281215/2 | [8] |    |
| 50*  | 1089    | Yes | CNGB3 | c.1148delC | p.T383fs | Pathogenic (PVS1, PS4, PM3_strong, PM2_sup) | 489/281215/2 | [8] | No |
|      |         |     | CNGB3 | c.1148delC | p.T383fs | Pathogenic (PVS1, PS4, PM3_strong, PM2_sup) | 489/281215/2 | [8] |    |
| 59   | No      |     | CNGB3 | c.1148delC | p.T383fs | Pathogenic (PVS1, PS4, PM3_strong, PM2_sup) | 489/281215/2 | [8] | No |
|      |         |     | CNGB3 | c.1148delC | p.T383fs | Pathogenic (PVS1, PS4, PM3_strong, PM2_sup) | 489/281215/2 | [8] |    |
| 97** | Unknown |     | CNGB3 | c.1148delC | p.T383fs | Pathogenic (PVS1, PS4, PM3_strong, PM2_sup) | 489/281215/2 | [8] | No |
|      |         |     | CNGB3 | c.1148delC | p.T383fs | Pathogenic (PVS1, PS4, PM3_strong, PM2_sup) | 489/281215/2 | [8] |    |
| 98   | No      |     | CNGB3 | c.1148delC | p.T383fs | Pathogenic (PVS1, PS4, PM3_strong, PM2_sup) | 489/281215/2 | [8] | No |

|     |     |    |       |                        |          |                                             |              |      |    |
|-----|-----|----|-------|------------------------|----------|---------------------------------------------|--------------|------|----|
|     |     |    | CNGB3 | c.1148delC             | p.T383fs | Pathogenic (PVS1, PS4, PM3_strong, PM2_sup) | 489/281215/2 | [8]  |    |
| 2   | 217 | No | CNGB3 | c.1148delC             | p.T383fs | Pathogenic (PVS1, PS4, PM3_strong, PM2_sup) | 489/281215/2 | [8]  | No |
|     |     |    | CNGB3 | c.1432C>T              | p.R478*  | Pathogenic (PVS1, PS4, PM2_sup), PM3        | 5/251095/0   | [12] |    |
| 37* | 217 | No | CNGB3 | c.1148delC             | p.T383fs | Pathogenic (PVS1, PS4, PM3_strong, PM2_sup) | 489/281215/2 | [8]  | No |
|     |     |    | CNGB3 | c.1432C>T              | p.R478*  | Pathogenic (PVS1, PS4, PM2_sup), PM3        | 5/251095/0   | [12] |    |
| 38* | 217 | No | CNGB3 | c.1148delC             | p.T383fs | Pathogenic (PVS1, PS4, PM3_strong, PM2_sup) | 489/281215/2 | [8]  | No |
|     |     |    | CNGB3 | c.1432C>T              | p.R478*  | Pathogenic (PVS1, PS4, PM2_sup) PM3         | 5/251095/0   | [12] |    |
| 4*  | 210 | No | CNGB3 | c.1148delC             | p.T383fs | Pathogenic (PVS1, PS4, PM3_strong, PM2_sup) | 489/281215/2 | [8]  | No |
|     |     |    | CNGB3 | c.467C>T               | p.S156F  | VUS (PS4_mod, PM2_sup, BP4)                 | 14/282812/0  | [12] |    |
| 39  | 210 | No | CNGB3 | c.1148delC             | p.T383fs | Pathogenic (PVS1, PS4, PM3_strong, PM2_sup) | 489/281215/2 | [8]  | No |
|     |     |    | CNGB3 | c.467C>T               | p.S156F  | VUS (PS4_mod, PM2_sup, BP4)                 | 14/282812/0  | [12] |    |
| 8   |     | No | CNGB3 | c.1148delC             | p.T383fs | Pathogenic (PVS1, PS4, PM3_strong, PM2_sup) | 489/281215/2 | [8]  | No |
|     |     |    | CNGB3 | c.1299_1300delG<br>T   | p.F434fs | Pathogenic (PVS1, PS4_sup, PM2_sup)         | NP           | [13] |    |
| 35  | 207 | No | CNGB3 | c.1148delC             | p.T383fs | Pathogenic (PVS1, PS4, PM3_strong, PM2_sup) | 489/281215/2 | [8]  | No |
|     |     |    | CNGB3 | c.886-<br>896del11insT | p.T296fs | Pathogenic (PVS1, PS4_mod, PM2_sup)         | NP           | [13] |    |
| 36* | 207 | No | CNGB3 | c.1148delC             | p.T383fs | Pathogenic (PVS1, PS4, PM3_strong, PM2_sup) | 489/281215/2 | [8]  | No |
|     |     |    | CNGB3 | c.886-<br>896del11insT | p.T296fs | Pathogenic (PVS1, PS4_mod, PM2_sup)         | NP           | [13] |    |
| 51  |     | No | CNGB3 | c.1148delC             | p.T383fs | Pathogenic (PVS1, PS4, PM3_strong, PM2_sup) | 489/281215/2 | [8]  | No |
|     |     |    | CNGB3 | c.589_590delTT         | p.L197fs | Pathogenic (PVS1, PS4_sup, PM2_sup)         | NP           | [13] |    |

|     |     |     |       |                     |             |                                                          |                |       |                      |
|-----|-----|-----|-------|---------------------|-------------|----------------------------------------------------------|----------------|-------|----------------------|
| 69  | No  |     | CNGB3 | c.1148delC          | p.T383fs    | Pathogenic (PVS1, PS4, PM3_strong, PM2_sup)              | 489/281215/2   | [8]   | No                   |
|     |     |     | CNGB3 | c.1431delG          | p.K477fs    | Pathogenic (PVS1, PM2_sup, PM3)                          | NP             | Novel |                      |
| 74  | No  |     | CNGB3 | c.1148delC          | p.T383fs    | Pathogenic (PVS1, PS4, PM3_strong, PM2_sup)              | 489/281215/2   | [8]   | No                   |
|     |     |     | CNGB3 | c.1700G>A           | p.G567E     | Likely pathogenic (PS4_sup, PP3_strong, PM2_sup)         | 1/251083/0     | [14]  |                      |
| 80  | No  |     | CNGB3 | c.1148delC          | p.T383fs    | Pathogenic (PVS1, PS4, PM3_strong, PM2_sup)              | 489/281215/2   | [8]   | No                   |
|     |     |     | CNGB3 | c.1208G>A           | p.R403Q     | Pathogenic (PS4_strong, PM3_very strong, PS3_mod, BS)    | 1128/281228/24 | [9]   |                      |
| 100 | No  |     | CNGB3 | c.1148delC          | p.T383fs    | Pathogenic (PVS1, PS4, PM3_strong, PM2_sup)              | 489/281215/2   | [8]   | No                   |
|     |     |     | CNGB3 | c.1208G>A           | p.R403Q     | Pathogenic (PS4_strong, PM3_very strong, PS3_mod, BS)    | 1128/281228/24 | [9]   |                      |
| 52  | 203 | Yes | CNGB3 | c.1430_1431delin sC | p.K477fs*17 | Pathogenic (PVS1, PM2_sup, PM3)                          | NP             | [13]  | Yes [15–17] (CHRO89) |
|     |     |     | CNGB3 | c.1430_1431delin sC | p.K477fs*17 | Pathogenic (PVS1, PM2_sup, PM3)                          | NP             | [13]  |                      |
| 54  | 203 | Yes | CNGB3 | c.1430_1431delin sC | p.K477fs*17 | Pathogenic (PVS1, PM2_sup, PM3)                          | NP             | [13]  | Yes [15–17] (CHRO89) |
|     |     |     | CNGB3 | c.1430_1431delin sC | p.K477fs*17 | Pathogenic (PVS1, PM2_sup, PM3)                          | NP             | [13]  |                      |
| 55  | 215 | Yes | CNGB3 | c.702T>A            | p.C234*     | Pathogenic (PVS1, PM2_sup, PM3)                          | NP             | [13]  | No                   |
|     |     |     | CNGB3 | c.702T>A            | p.C234*     | Pathogenic (PVS1, PM2_sup, PM3)                          | NP             | [13]  |                      |
| 56* | 215 | Yes | CNGB3 | c.702T>A            | p.C234*     | Pathogenic (PVS1, PM2_sup, PM3)                          | NP             | [13]  | No                   |
|     |     |     | CNGB3 | c.702T>A            | p.C234*     | Pathogenic (PVS1, PM2_sup, PM3)                          | NP             | [13]  |                      |
| 72  | No  |     | CNGB3 | c.1700G>A           | p.G567E     | Likely pathogenic PP3_strong, PM2_sup, PM3_sup, PS4_sup) | 1/251083/0     | [14]  | No                   |
|     |     |     | CNGB3 | c.1700G>A           | p.G567E     | Likely pathogenic PP3_strong, PM2_sup, PM3_sup, PS4_sup) | 1/251083/0     | [14]  |                      |

|    |                         |     |       |                                                                 |            |                                          |            |       |                      |
|----|-------------------------|-----|-------|-----------------------------------------------------------------|------------|------------------------------------------|------------|-------|----------------------|
| 75 |                         | Yes | CNGB3 | arr[Hg19]8q21.3<br>(87,736,031-<br>87,742,065=x0<br>hmz mat pat | Del exon 3 |                                          |            |       | No                   |
|    |                         |     | CNGB3 | arr[Hg19]8q21.3<br>(87,736,031-<br>87,742,065=x0<br>hmz mat pat | Del exon 3 |                                          |            |       |                      |
| 99 |                         | No  | CNGB3 | c.702T>A                                                        | p.C234*    | Pathogenic (PVS1, PM2_sup,<br>PM3)       | NP         | [13]  | No                   |
|    |                         |     | CNGB3 | c.756C>G                                                        | p.Y252*    | Pathogenic (PVS1, PM2_sup,<br>PS4_sup)   | 1/251445/0 | [13]  |                      |
| 57 | 202                     | Yes | GNAT2 | c.481C>T                                                        | p.R161*    | Pathogenic (PVS1, PS4_mod,<br>PM2_sup)   | 5/282855/0 | [18]  | Yes [18] (CHRO73)    |
|    |                         |     | GNAT2 | c.481C>T                                                        | p.R161*    | Pathogenic (PVS1, PS4_mod,<br>PM2_sup)   | 5/282855/0 | [18]  |                      |
| 82 | 202                     | Yes | GNAT2 | c.481C>T                                                        | p.R161*    | Pathogenic (PVS1, PS4_mod,<br>PM2_sup)   | 5/282855/0 | [18]  | Yes [18] (CHRO73)    |
|    |                         |     | GNAT2 | c.481C>T                                                        | p.R161*    | Pathogenic (PVS1, PS4_mod,<br>PM2_sup)   | 5/282855/0 | [18]  |                      |
| 83 | 101<br>(ID79<br>cousin) | No  | GNAT2 | c.285-<br>291delinsCTGT<br>AT                                   | p.A96fs    | Likely pathogenic (PVS1,<br>PM2_sup)     | NP         | [19]  | Yes [18–20] (CHRO87) |
|    |                         |     | GNAT2 | c.461+24G>A                                                     | p.?        | Likely pathogenic (PS3,<br>PM2_sup, PM3) | NP         | [20]  |                      |
| 79 | 101                     | No  | GNAT2 | c.285-<br>291delinsCTGT<br>AT                                   | p.A96fs    | Likely pathogenic (PVS1,<br>PM2_sup)     | NP         | [19]  | Yes [18–20] (CHRO87) |
|    |                         |     | GNAT2 | c.285-<br>291delinsCTGT<br>AT                                   | p.A96fs    | Likely pathogenic (PVS1,<br>PM2_sup)     | NP         | [19]  |                      |
| 67 |                         | Yes | PDE6C | c.1936-2A>G                                                     | p.?        | Pathogenic (PVS1, PM3_sup,<br>PM2_sup)   | NP         | Novel | No                   |
|    |                         |     | PDE6C | c.1936-2A>G                                                     | p.?        | Pathogenic (PVS1, PM3_sup,<br>PM2_sup)   | NP         | Novel |                      |

|     |     |     |              |             |        |                                                   |             |       |                       |
|-----|-----|-----|--------------|-------------|--------|---------------------------------------------------|-------------|-------|-----------------------|
| 81  |     | No  | <i>PDE6C</i> | c.85C>T     | p.R29W | Pathogenic (PS4, PS3, PM2_sup, PM3)               | NP          | [21]  | Yes [22]<br>(CHRO319) |
|     |     |     | <i>PDE6C</i> | c.2144+1G>A | p.?    | Likely pathogenic (PVS1_strong, PM2_sup; PS4_sup) | NP          | [22]  |                       |
| 84  | 218 | Yes | <i>PDE6C</i> | c.297C>G    | p.F99L | VUS (PM2_sup)                                     | NP          | Novel | No                    |
|     |     |     | <i>PDE6C</i> | c.939+5G>T  | p.?    | Likely pathogenic (PVS1_strong, PM5, PM2_sup)     | NP          | Novel |                       |
| 85* | 218 | Yes | <i>PDE6C</i> | c.297C>G    | p.F99L | VUS (PM2_sup)                                     | NP          | Novel | No                    |
|     |     |     | <i>PDE6C</i> | c.939+5G>T  | p.?    | Likely pathogenic (PVS1_strong, PM5, PM2_sup)     | NP          | Novel |                       |
| 91  |     | Yes | <i>PDE6C</i> | c.1071+5G>A | p.?    | Pathogenic (PVS1, PM2_sup, PM3_sup)               | NP          | Novel | No                    |
|     |     |     | <i>PDE6C</i> | c.1071+5G>A | p.?    | Pathogenic (PVS1, PM2_sup, PM3_sup)               | NP          | Novel |                       |
| 86  | 423 | Yes | <i>PDE6H</i> | c.35C>G     | p.S12* | Pathogenic (PVS1, PS4, PM3, PM2_sup)              | 26/282590/0 | [23]  | No                    |
|     |     |     | <i>PDE6H</i> | c.35C>G     | p.S12* | Pathogenic (PVS1, PS4, PM3, PM2_sup)              | 26/282590/0 | [23]  |                       |
| 87* | 423 | Yes | <i>PDE6H</i> | c.35C>G     | p.S12* | Pathogenic (PVS1, PS4, PM3, PM2_sup)              | 26/282590/0 | [23]  | No                    |
|     |     |     | <i>PDE6H</i> | c.35C>G     | p.S12* | Pathogenic (PVS1, PS4, PM3, PM2_sup)              | 26/282590/0 | [23]  |                       |
| 88  | 409 | No  | <i>PDE6H</i> | c.35C>G     | p.S12* | Pathogenic (PVS1, PS4, PM3, PM2_sup)              | 26/282590/0 | [23]  | No                    |
|     |     |     | <i>PDE6H</i> | c.35C>G     | p.S12* | Pathogenic (PVS1, PS4, PM3, PM2_sup)              | 26/282590/0 | [23]  |                       |
| 89  | 409 | No  | <i>PDE6H</i> | c.35C>G     | p.S12* | Pathogenic (PVS1, PS4, PM3, PM2_sup)              | 26/282590/0 | [23]  | No                    |
|     |     |     | <i>PDE6H</i> | c.35C>G     | p.S12* | Pathogenic (PVS1, PS4, PM3, PM2_sup)              | 26/282590/0 | [23]  |                       |
| 90  | 409 | No  | <i>PDE6H</i> | c.35C>G     | p.S12* | Pathogenic (PVS1, PS4, PM3, PM2_sup)              | 26/282590/0 | [23]  | No                    |
|     |     |     | <i>PDE6H</i> | c.35C>G     | p.S12* | Pathogenic (PVS1, PS4, PM3, PM2_sup)              | 26/282590/0 | [23]  |                       |

\*Variant has been identified in sibling

\*\*Clinical data not available

## References

1. Wissinger, B.; Gamer, D.; Jägle, H.; Giorda, R.; Marx, T.; Mayer, S.; Tippmann, S.; Broghammer, M.; Jurklies, B.; Rosenberg, T.; et al. CNGA3 Mutations in Hereditary Cone Photoreceptor Disorders. *Am. J. Hum. Genet.* **2001**, *69*, 722–737, doi:10.1086/323613.
2. Burgueño-Montañés, C.; Colunga Cueva, M.; Costales Álvarez, C. Una Nueva Mutación En El Gen CNGA3 Causante de Acromatopsia Incompleta. *Arch. Soc. Esp. Oftalmol.* **2014**, *89*, 107–109, doi:10.1016/j.oftal.2012.07.019.
3. Kohl, S.; Marx, T.; Giddings, I.; Jägle, H.; Jacobson, S.G.; Apfelstedt-Sylla, E.; Zrenner, E.; Sharpe, L.T.; Wissinger, B. Total Colourblindness Is Caused by Mutations in the Gene Encoding the  $\alpha$ -Subunit of the Cone Photoreceptor CGMP-Gated Cation Channel. *Nat. Genet.* **1998**, *19*, 257–259, doi:10.1038/935.
4. Muraki-Oda, S.; Toyoda, F.; Okada, A.; Tanabe, S.; Yamade, S.; Ueyama, H.; Matsuura, H.; Ohji, M. Functional Analysis of Rod Monochromacy-Associated Missense Mutations in the CNGA3 Subunit of the Cone Photoreceptor CGMP-Gated Channel. *Biochem. Biophys. Res. Commun.* **2007**, *362*, 88–93, doi:10.1016/j.bbrc.2007.07.152.
5. Solaki, M.; Baumann, B.; Reuter, P.; Andreasson, S.; Audo, I.; Ayuso, C.; Balousha, G.; Benedicenti, F.; Birch, D.; Bitoun, P.; et al. Comprehensive Variant Spectrum of the CNGA3 Gene in Patients Affected by Achromatopsia. *Hum. Mutat.* **2022**, doi:10.1002/humu.24371.
6. Johnson, S.; Michaelides, M.; Aligianis, I.A.; Ainsworth, J.R.; Mollon, J.D.; Maher, E.R.; Moore, A.T.; Hunt, D.M. Achromatopsia Caused by Novel Mutations in Both CNGA3 and CNGB3. *J. Med. Genet.* **2004**, *41*, e20, doi:10.1136/jmg.2003.011437.
7. Zelinger, L.; Cideciyan, A. V.; Kohl, S.; Schwartz, S.B.; Rosenmann, A.; Eli, D.; Sumaroka, A.; Roman, A.J.; Luo, X.; Brown, C.; et al. Genetics and Disease Expression in the CNGA3 Form of Achromatopsia: Steps on the Path to Gene Therapy. *Ophthalmology* **2015**, *122*, 997–1007, doi:10.1016/j.ophtha.2014.11.025.
8. Kohl, S.; Baumann, B.; Broghammer, M.; Jägle, H.; Sieving, P.; Kellner, U.; Spegal, R.; Anastasi, M.; Zrenner, E.; Sharpe, L.T.; et al. Mutations in the CNGB3 Gene Encoding the Beta-Subunit of the Cone Photoreceptor CGMP-Gated Channel Are Responsible for Achromatopsia (ACHM3) Linked to Chromosome 8q21. *Hum. Mol. Genet.* **2000**, *9*, 2107–2116, doi:10.1093/hmg/9.14.2107.
9. Michaelides, M.; Aligianis, I.A.; Ainsworth, J.R.; Good, P.; Mollon, J.D.; Maher, E.R.; Moore, A.T.; Hunt, D.M. Progressive Cone Dystrophy Associated with Mutation in CNGB3. *Invest. Ophthalmol. Vis. Sci.* **2004**, *45*, 1975–1982, doi:10.1167/iovs.03-0898.
10. S. Ry Andersen On Congenital Total Colou Blindness Coexisting with Heredo-Labyrinthine Deafness. *Acta Ophthalmol.* **1946**, *24*, 99–112.
11. Ejler Holm, C.; Lodberg, C.V. A Family with Total Colour-Blindness. *Acta Ophthalmol.* **1940**, *18*, 224–258.
12. Kohl, S.; Varsanyi, B.; Antunes, G.A.; Baumann, B.; Hoyng, C.B.; Jägle, H.; Rosenberg, T.; Kellner, U.; Lorenz, B.; Salati, R.; et al. CNGB3 Mutations Account for 50% of All Cases with Autosomal Recessive Achromatopsia. *Eur. J. Hum. Genet.* **2005**, *13*, 302–308, doi:10.1038/sj.ejhg.5201269.
13. Mayer, A.K.; Cauwenbergh, C.; Rother, C.; Baumann, B.; Reuter, P.; Baere, E.; Wissinger, B.; Kohl, S. CNGB3 Mutation Spectrum Including Copy Number Variations in 552 Achromatopsia Patients. *Hum. Mutat.* **2017**, *38*, 1579–1591, doi:10.1002/humu.23311.
14. Jespersgaard, C.; Fang, M.; Bertelsen, M.; Dang, X.; Jensen, H.; Chen, Y.; Bech, N.; Dai, L.; Rosenberg, T.; Zhang, J.; et al. Molecular Genetic Analysis Using Targeted NGS Analysis of 677 Individuals with Retinal Dystrophy. *Sci. Rep.* **2019**, *9*, 1219, doi:10.1038/s41598-018-38007-2.
15. Weisschuh, N.; Mayer, A.K.; Strom, T.M.; Kohl, S.; Glöckle, N.; Schubach, M.; Andreasson, S.; Bernd, A.; Birch, D.G.; Hamel, C.P.; et al. Mutation Detection in Patients with Retinal Dystrophies Using Targeted Next Generation Sequencing. *PLoS One* **2016**, *11*, e0145951, doi:10.1371/journal.pone.0145951.
16. Rosenberg, Thomas; Olsen, Jens V.; Weisschuh, Nicole; Kohl, S.W.B. Old Mystery Solved: Achromatopsia, the Fuur Genealogy in Retrospective. *Ann. Case Reports* **2021**, *6*, 1–6, doi:10.29011/2574-7754.100628.
17. Franceschetti, A.; Jaeger, W.; Klein, D.; Ohrt, V.; Rickly, H. Etude Patho-Physiologique de La Grande Famille d'achromats de l'île de Fur (Danemark). *Concil. Ophthalmol.* **1958**.
18. Felden, J.; Baumann, B.; Ali, M.; Audo, I.; Ayuso, C.; Bocquet, B.; Casteels, I.; Garcia-Sandoval, B.; Jacobson, S.G.; Jurklies, B.; et al. Mutation Spectrum and Clinical Investigation of Achromatopsia Patients with Mutations in the GNAT2 Gene. *Hum. Mutat.* **2019**, humu.23768, doi:10.1002/humu.23768.

19. Kohl, S.; Baumann, B.; Rosenberg, T.; Kellner, U.; Lorenz, B.; Vadalà, M.; Jacobson, S.G.; Wissinger, B. Mutations in the Cone Photoreceptor G-Protein  $\alpha$ -Subunit Gene GNAT2 in Patients with Achromatopsia. *Am. J. Hum. Genet.* **2002**, *71*, 422–425, doi:10.1086/341835.
20. Rosenberg, T.; Baumann, B.; Kohl, S.; Zrenner, E.; Jorgensen, A.L.; Wissinger, B. Variant Phenotypes of Incomplete Achromatopsia in Two Cousins with GNAT2 Gene Mutations. *Investig. Ophthalmology Vis. Sci.* **2004**, *45*, 4256, doi:10.1167/iovs.04-0317.
21. Thiadens, A.A.H.J.; den Hollander, A.I.; Roosing, S.; Nabuurs, S.B.; Zekveld-Vroon, R.C.; Collin, R.W.J.; De Baere, E.; Koenekoop, R.K.; van Schooneveld, M.J.; Strom, T.M.; et al. Homozygosity Mapping Reveals PDE6C Mutations in Patients with Early-Onset Cone Photoreceptor Disorders. *Am. J. Hum. Genet.* **2009**, *85*, 240–247, doi:10.1016/j.ajhg.2009.06.016.
22. Grau, T.; Artemyev, N.O.; Rosenberg, T.; Dollfus, H.; Haugen, O.H.; Cumhur Sener, E.; Jurklies, B.; Andreasson, S.; Kernstock, C.; Larsen, M.; et al. Decreased Catalytic Activity and Altered Activation Properties of PDE6C Mutants Associated with Autosomal Recessive Achromatopsia. *Hum. Mol. Genet.* **2011**, *20*, 719–730, doi:10.1093/hmg/ddq517.
23. Kohl, S.; Coppieters, F.; Meire, F.; Schaich, S.; Roosing, S.; Brennenstuhl, C.; Bolz, S.; van Genderen, M.M.; Riemsdag, F.C.C.; Lukowski, R.; et al. A Nonsense Mutation in PDE6H Causes Autosomal-Recessive Incomplete Achromatopsia. *Am. J. Hum. Genet.* **2012**, *91*, 527–532, doi:10.1016/j.ajhg.2012.07.006.
